# Supplementary material
Source: PubMed Central journal article supplement (PMC4538478)
Supplement: AAC.00904-15_zac009154295so1.pdf [file AAC.00904-15_zac009154295so1.pdf]

Supplemental Material for:

***Pseudomonas aeruginosa* high-level resistance to polymyxin and other antimicrobial peptides requires *cprA*, a gene that is disrupted in the PAO1 strain**

Alina D. Gutu,<sup>a</sup> Nicole S. Rodgers,<sup>a</sup> Jihye Park,<sup>a,b</sup> and Samuel M. Moskowitz<sup>a,b</sup>

Department of Pediatrics, Massachusetts General Hospital, Boston, Massachusetts, USA<sup>a</sup>

Department of Pediatrics, Harvard Medical School, Boston, Massachusetts, USA<sup>b</sup>

**Correspondence to:**

Samuel M. Moskowitz MD

Division of Pediatric Pulmonary Medicine

Massachusetts General Hospital

275 Cambridge Street

Boston, Massachusetts 02114

Telephone: 617-643-7232; Fax: 617-643-7234

Email: [smoskowitz@mgh.harvard.edu](mailto:smoskowitz@mgh.harvard.edu)

Table S1. Oligonucleotide primers used in this study

| Primer name                                | Primer no | Sequence (5'-3')                                              |
|--------------------------------------------|-----------|---------------------------------------------------------------|
| For deletion constructs                    |           |                                                               |
| $\Delta cprA$ 5'outflank (F)<br>attB1      | SM 1692   | <b>GGGGACAAGTTTGTACAAAAAAGCAGGCTGAATACCTCACCGAACAGGC</b>      |
| $\Delta cprA$ 3'outflank (R)<br>attB2      | SM 1694   | <b>GGGGACCACTTTGTACAAGAAAGCTGGGTGCTTCCATCCACGGTTATAC</b>      |
| $\Delta cprA$<br>5' delete (R)             | SM 1695   | CCTGCCGTCACCTGAAGTC <u><i>AAGCTT</i></u> ATGCATGTTTCATGTCTTCC |
| $\Delta cprA$<br>3' delete (F)             | SM 1693   | GGAAGACATGAACATGCAT <u><i>AAGCTT</i></u> GACTTCAAGTGACGGCAGG  |
| $\Delta cprA$ confirmation (R)             | SM 1684   | AGTAGCTGGTGGCGAACAGT                                          |
| $\Delta cprA$ confirmation (F)             | SM 1685   | TCATCGGTATCTGGCTGAACT                                         |
| For sequencing internal <i>cprA</i> region |           |                                                               |
| <i>cprA</i> (R)                            | SM 1842   | CGCGTCCAAGGCGGAAATCGA                                         |
| <i>cprA</i> (F)                            | SM 1843   | CGGCGGAGATATGATAGAGGCT                                        |
| <i>cprA</i> (R)                            | SM 1844   | AGGTGGAGCGGGTGATCAATT                                         |
| For <i>in trans cprA</i> complementation   |           |                                                               |
| <i>cprA</i> (F)                            | SM 1789   | <b>GGGGACAAGTTTGTACAAAAAAGCAGGCTCTGAGGGGGGAAGACATGAAC</b>     |
| <i>cprA</i> (R)                            | SM 1790   | <b>GGGGACCACTTTGTACAAGAAAGCTGGGTTCGCGCCTGCCGTCACCTTGAA</b>    |
| For qPCR                                   |           |                                                               |
| <i>cprA</i> (F)                            | SM 1870   | ACTGAAGCGTTTCTCCAC                                            |
| <i>cprA</i> (R)                            | SM 1871   | CTTGGACGCGGTGTAGTC                                            |
| <i>arnC</i> (F)                            | SM 1892   | TGATCCTCAACCGCAACTAC                                          |
| <i>arnC</i> (R)                            | SM 1893   | GTTCTGCAGGTCGGCAT                                             |
| PA4268 ORF (F)                             | SM 1872   | AACTCGGCACTGCGTAAG                                            |
| PA4268 ORF (R)                             | SM 1873   | TGTGCTCTTGCAGGTTGT                                            |
| For <i>cprA</i> allelic replacement        |           |                                                               |
| $\Delta cprA$ 5'outflank (F)<br>attB1      | SM 1692   | <b>GGGGACAAGTTTGTACAAAAAAGCAGGCTGAATACCTCACCGAACAGGC</b>      |
| $\Delta cprA$ 3'outflank (R)<br>attB2      | SM 1694   | <b>GGGGACCACTTTGTACAAGAAAGCTGGGTGCTTCCATCCACGGTTATAC</b>      |
| QuikChange F                               | SM 1968   | CCGGCAGCATCTTCTGGGTCTTCCGCATGGGCTTC                           |
| QuikChange R                               | SM 1969   | GAAGCCCATGCGGAAGACCCAGAAGATGCTGCCGG                           |
| <i>cprA</i> (R)                            | SM 1698   | GGTCAACTGGACATTGTTTC                                          |
| <i>cprA</i> (F)                            | SM 1701   | GCGCAGTTGCTCGACTGCT                                           |
| <i>cprA</i> (F)                            | SM 1686   | CACCCTGATTCTCGCCCAT                                           |
| <i>cprA</i> (F)                            | SM 1699   | TCATCTCGGTGATGTTGCT                                           |
| <i>cprA</i> (R)                            | SM 1842   | CGCGTCCAAGGCGGAAATCGA                                         |
| <i>cprA</i> (F)                            | SM 1843   | CGGCGGAGATATGATAGAGGCT                                        |
| <i>cprA</i> (R)                            | SM 1844   | AGGTGGAGCGGGTGATCAATT                                         |

Underlined and italic HindIII cutting site. In bold attB1 and attB2 sequence.

Table S2. Amino acid changes in CprA and corresponding *cprA* allele designations for 9 newly sequenced and 22 publicly available *P. aeruginosa* genomes and one *P. entomophila* genome.

| Strain                | Database        | Source of strain or data | Allele designation       | Amino acid change relative to WT                                                                                                                                                                                                                                                                                                                         |
|-----------------------|-----------------|--------------------------|--------------------------|----------------------------------------------------------------------------------------------------------------------------------------------------------------------------------------------------------------------------------------------------------------------------------------------------------------------------------------------------------|
| <i>P. aeruginosa</i>  |                 |                          |                          |                                                                                                                                                                                                                                                                                                                                                          |
| 1020 (CF isolate)     | --              | (1)                      | <i>cprA</i> <sup>+</sup> | --                                                                                                                                                                                                                                                                                                                                                       |
| 1603 (CF isolate)     | --              | (1)                      | <i>cprA</i> <sup>+</sup> | --                                                                                                                                                                                                                                                                                                                                                       |
| 1016 (CF isolate)     | --              | (1)                      | <i>cprA</i> <sup>+</sup> | --                                                                                                                                                                                                                                                                                                                                                       |
| 1611 (CF isolate)     | --              | (1)                      | <i>cprA</i> <sup>+</sup> | --                                                                                                                                                                                                                                                                                                                                                       |
| 2192                  | Pseudomonas.com | (2)                      | <i>cprA</i> <sup>+</sup> | --                                                                                                                                                                                                                                                                                                                                                       |
| 39016                 | Pseudomonas.com | (2)                      | <i>cprA</i> <sup>+</sup> | --                                                                                                                                                                                                                                                                                                                                                       |
| PACS2                 | Pseudomonas.com | (2)                      | <i>cprA</i> <sup>+</sup> | --                                                                                                                                                                                                                                                                                                                                                       |
| RP73                  | Pseudomonas.com | (2)                      | <i>cprA</i> <sup>+</sup> | --                                                                                                                                                                                                                                                                                                                                                       |
| DK2                   | Pseudomonas.com | (2)                      | <i>cprA</i> <sup>+</sup> | --                                                                                                                                                                                                                                                                                                                                                       |
| M18                   | Pseudomonas.com | (2)                      | <i>cprA</i> <sup>+</sup> | --                                                                                                                                                                                                                                                                                                                                                       |
| LESB58                | Pseudomonas.com | (2)                      | <i>cprA</i> <sup>+</sup> | --                                                                                                                                                                                                                                                                                                                                                       |
| B136-33               | Pseudomonas.com | (2)                      | <i>cprA</i> <sup>+</sup> | --                                                                                                                                                                                                                                                                                                                                                       |
| NCGM2.S1              | Pseudomonas.com | (2)                      | <i>cprA</i> <sup>+</sup> | --                                                                                                                                                                                                                                                                                                                                                       |
| SCV20265              | NCBI            | (3)                      | <i>cprA</i> <sup>+</sup> | --                                                                                                                                                                                                                                                                                                                                                       |
| LES431                | NCBI            | (3)                      | <i>cprA</i> <sup>+</sup> | --                                                                                                                                                                                                                                                                                                                                                       |
| PA1                   | NCBI            | (3)                      | <i>cprA</i> <sup>+</sup> | --                                                                                                                                                                                                                                                                                                                                                       |
| PA1R                  | NCBI            | (3)                      | <i>cprA</i> <sup>+</sup> | --                                                                                                                                                                                                                                                                                                                                                       |
| 1027 (PAO1 Lory)      | --              | (4)                      | <i>cprA1</i>             | frameshift [V224S...V244X]                                                                                                                                                                                                                                                                                                                               |
| 1555 (PAO1 Franklin)  | --              | (5)                      | <i>cprA1</i>             | frameshift [V224S...V244X]                                                                                                                                                                                                                                                                                                                               |
| 2114 (PAO1 Manoil)    | --              | (6)                      | <i>cprA1</i>             | frameshift [V224S...V244X]                                                                                                                                                                                                                                                                                                                               |
| 2178 (PAO1 Vasil)     | --              | (7)                      | <i>cprA1</i>             | frameshift [V224S...V244X]                                                                                                                                                                                                                                                                                                                               |
| PAO1                  | Pseudomonas.com | (2, 4)                   | <i>cprA1</i>             | frameshift [V224S...V244X]                                                                                                                                                                                                                                                                                                                               |
| PAO1-VE2              | NCBI            | (3)                      | <i>cprA1</i>             | frameshift [V224S...V244X]                                                                                                                                                                                                                                                                                                                               |
| PAO1-VE13             | NCBI            | (3)                      | <i>cprA1</i>             | frameshift [V224S...V244X]                                                                                                                                                                                                                                                                                                                               |
| PAO581                | NCBI            | (3)                      | <i>cprA1</i>             | frameshift [V224S...V244X]                                                                                                                                                                                                                                                                                                                               |
| 1026 (PAK)            | --              | (8)                      | <i>cprA2</i>             | E192Q, G196D                                                                                                                                                                                                                                                                                                                                             |
| MTB-1                 | NCBI            | (3)                      | <i>cprA2</i>             | E192Q, G196D                                                                                                                                                                                                                                                                                                                                             |
| UCBPP_PA14            | Pseudomonas.com | (2)                      | unassigned               | A33S, A73T                                                                                                                                                                                                                                                                                                                                               |
| C3719                 | Pseudomonas.com | (2)                      | unassigned               | S347N                                                                                                                                                                                                                                                                                                                                                    |
| PA7                   | Pseudomonas.com | (2)                      | unassigned               | I13T, Q35R, A39D, D71A, A73I, C75Y, L76M, R79G, A80T, L84I, P99L, D135E, E160Q, D239E, C262R, R275H, E298G, E304D, S355A, A356P                                                                                                                                                                                                                          |
| <i>P. entomophila</i> |                 |                          |                          |                                                                                                                                                                                                                                                                                                                                                          |
| L48                   | Pseudomonas.com | (2)                      | unassigned               | M3S, A5V, D6T, E8A, Q9P, I10H, T11A, A12L, I13H, D14Q, T15L, R16P, A33T, A39D, H41Q, G42A, S46C, G63D, M67Q, D71S, E72Q, C75N, R79G, A80E, L84I, S92T, A95P, E105D, D128E, F131Y, D135E, L137M, Q158E, A171E, E193Q, G196S, T212S, C262Q, S266D, R275G, A276S, G281A, R289L, A294Q, E304D, E310S, K313S, S317T, S355A, A356V, Q369R, A373G, P377A, A378T |

1. **Moskowitz, S. M., M. K. Brannon, N. Dasgupta, M. Pier, N. Sgambati, A. K. Miller, S. E. Selgrade, S. I. Miller, M. Denton, S. P. Conway, H. K. Johansen, and N. Høiby.** 2012. PmrB mutations promote polymyxin resistance of *Pseudomonas aeruginosa* isolated from colistin-treated cystic fibrosis patients. *Antimicrob Agents Chemother* **56**:1019-1030.
2. **Winsor, G. L., D. K. Lam, L. Fleming, R. Lo, M. D. Whiteside, N. Y. Yu, R. E. Hancock, and F. S. Brinkman.** 2011. *Pseudomonas* Genome Database: improved comparative analysis and population genomics capability for *Pseudomonas* genomes. *Nucleic Acids Res* **39**:D596-600.
3. **Tatusova, T., S. Ciufu, B. Fedorov, K. O'Neill, and I. Tolstoy.** 2014. RefSeq microbial genomes database: new representation and annotation strategy. *Nucleic Acids Res* **42**:D553-559.
4. **Stover, C. K., X. Q. Pham, A. L. Erwin, S. D. Mizoguchi, P. Warrener, M. J. Hickey, F. S. Brinkman, W. O. Hufnagle, D. J. Kowalik, M. Lagrou, R. L. Garber, L. Goltry, E. Tolentino, S. Westbrook-Wadman, Y. Yuan, L. L. Brody, S. N. Coulter, K. R. Folger, A. Kas, K. Larbig, R. Lim, K. Smith, D. Spencer, G. K. Wong, Z. Wu, I. T. Paulsen, J. Reizer, M. H. Saier, R. E. Hancock, S. Lory, and M. V. Olson.** 2000. Complete genome sequence of *Pseudomonas aeruginosa* PAO1, an opportunistic pathogen. *Nature* **406**:959-964.
5. **Sarkisova, S., M. A. Patrauchan, D. Berglund, D. E. Nivens, and M. J. Franklin.** 2005. Calcium-induced virulence factors associated with the extracellular matrix of mucoid *Pseudomonas aeruginosa* biofilms. *J Bacteriol* **187**:4327-4337.
6. **Gallagher, L. A., and C. Manoil.** 2001. *Pseudomonas aeruginosa* PAO1 kills *Caenorhabditis elegans* by cyanide poisoning. *J Bacteriol* **183**:6207-6214.
7. **Ochsner, U. A., A. I. Vasil, Z. Johnson, and M. L. Vasil.** 1999. *Pseudomonas aeruginosa fur* overlaps with a gene encoding a novel outer membrane lipoprotein, OmlA. *J Bacteriol* **181**:1099-1109.
8. **Strom, M. S., and S. Lory.** 1986. Cloning and expression of the pilin gene of *Pseudomonas aeruginosa* PAK in *Escherichia coli*. *Journal of Bacteriology* **165**:367-372.

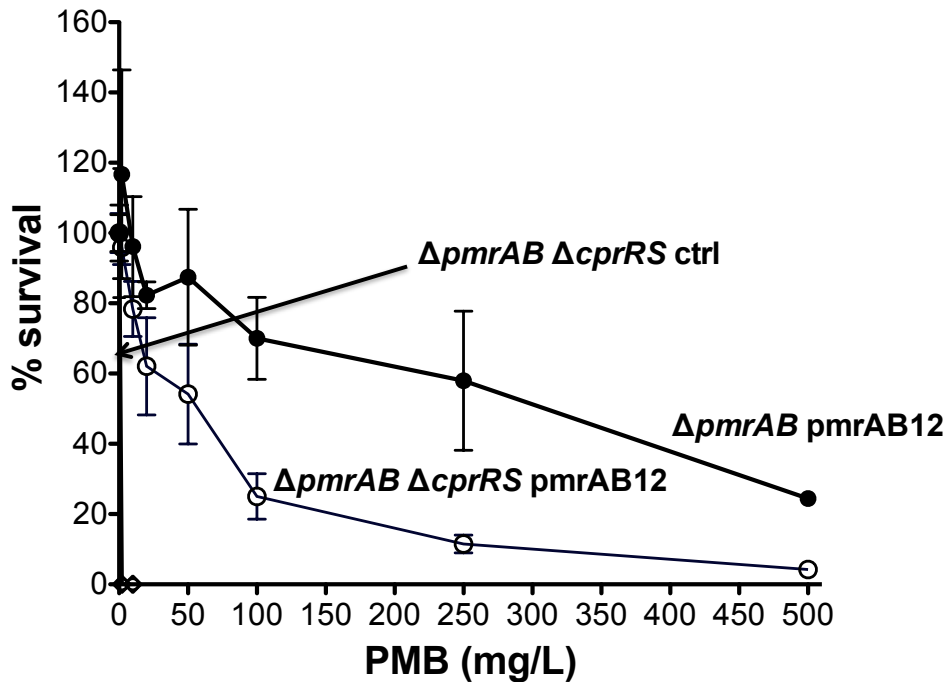

**Figure S1.** Effect of *cprRS* deletion on Pm resistance in a PAK  $\Delta pmrAB$  strain over-expressing *pmrAB12*. Here and in Fig. S3, Pm resistance experiments were performed twice; if discrepancies were seen, the experiment was performed a third time. Each panel shows a representative experiment, with results expressed as means of three technical replicates. Error bars are  $\pm$ SD. The non-italicized allele name indicates the presence of an episomal version, i.e., an inducible expression strain; “ctrl” signifies empty vector control. PMB plate assay of strain 4232 ( $\Delta pmrAB \Delta cprRS pmrAB12$ ) induced with 0.1% L-Ara for 24 h, with strain 2735 ( $\Delta pmrAB pmrAB12$ ) as a positive control and strain 4234 ( $\Delta pmrAB \Delta cprRS$  ctrl) as a negative control.

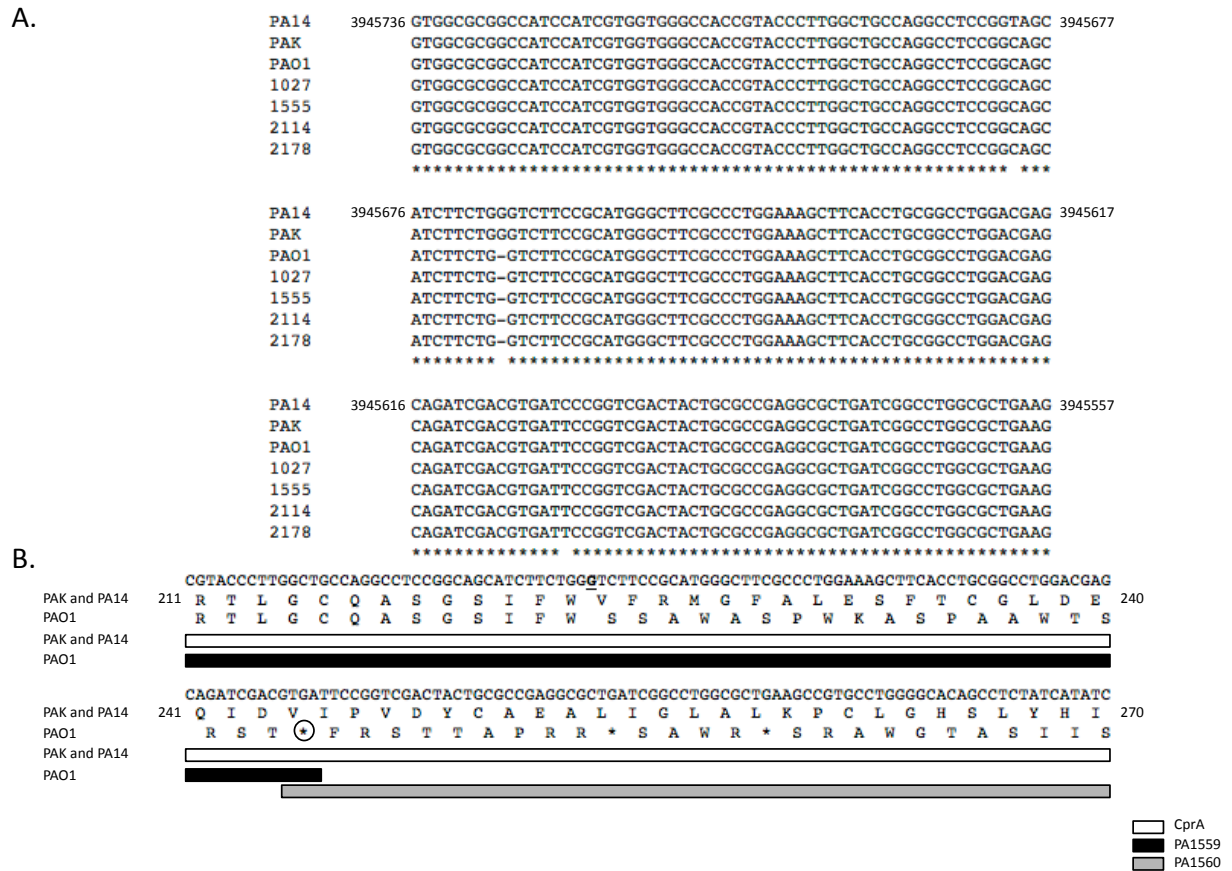

**Figure S2.** (A) Sequence alignment of the *cprA1* allele from the published genome of PAO1 strain (“PAO1”) and additional re-sequenced *cprA1* alleles of PAO1 substrains obtained from multiple laboratories (“1027”, S. Lory; “1555”, M. Franklin; “2114”, C. Manoil; “2178”, M. Vasil), with the *cprA* allele from the PA14\_44311 strain and the *cprA2* allele from the PAK strain (“PAK”) as the reference sequence. A guanine nucleotide at position 3945668 of the PA14 genomic sequence is missing in all of the PAO1 strain backgrounds. (B) Diagram illustrating the consequence of the frameshift mutation in the *cprA1* allele of the PAO1 strain, resulting in tandem ORFs that have been annotated in the PAO1 genome as PA1559 and PA1560.

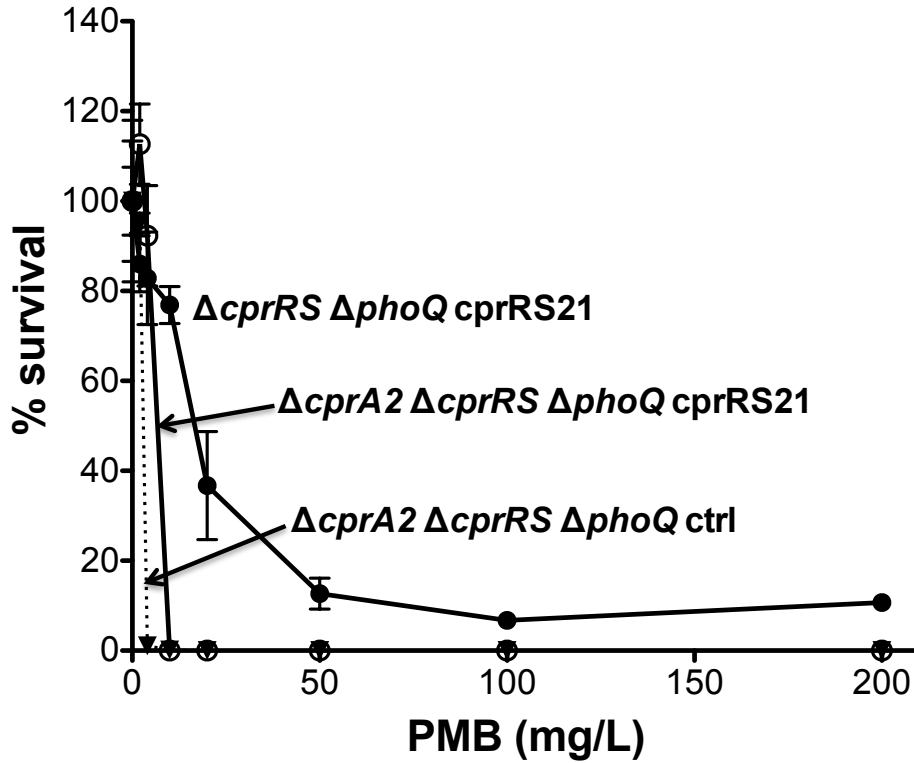

**Figure S3.** Effect of *cprA2* deletion on Pm resistance of the PAK  $\Delta cprRS \Delta phoQ cprRS21$  strain. PMB plate assay data of strain 4608 ( $\Delta cprA2 \Delta cprRS \Delta phoQ cprRS21$ ), induced with 0.1% L-Ara for 24 h, with strain 4200 ( $\Delta cprRS \Delta phoQ cprRS21$ ) as a positive control and strain 4612 ( $\Delta cprA2 \Delta cprRS \Delta phoQ ctrl$ ) as a negative control; the last of these had Pm susceptibility similar to the PAK parental strain (not shown).

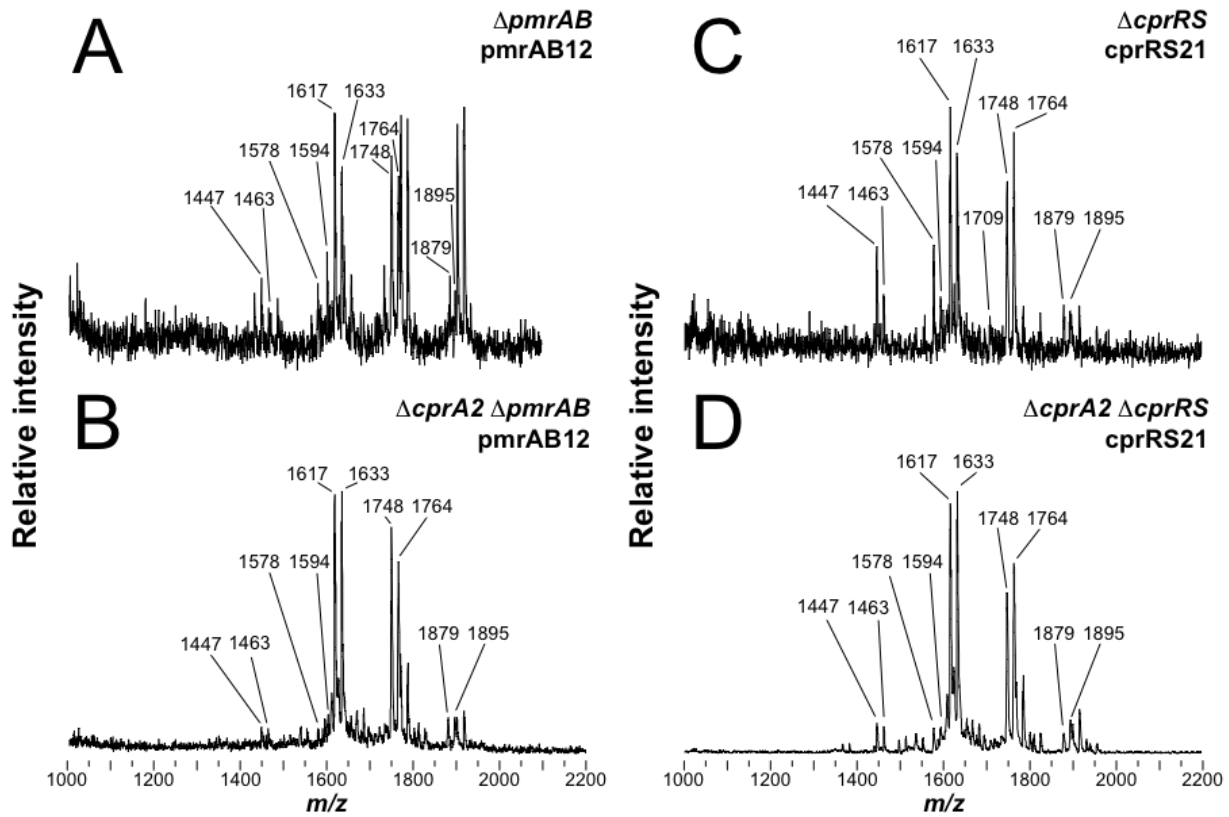

**Figure S4.** MALDI-TOF spectra of lipid A isolated from PAK strain background. (A) Strain 2735 ( $\Delta pmrAB$  *pmrAB12*); (B) strain 4519 ( $\Delta cprA2$   $\Delta pmrAB$  *pmrAB12*); (C) strain 4240 ( $\Delta cprRS$  *cprRS21*); and (D) strain 4425 ( $\Delta cprA2$   $\Delta cprRS$  *cprRS21*). The non-italicized allele name indicates the presence of an episomal version, i.e., an inducible expression strain.
